# Supplementary material for: KCTD10 regulates brain development by destabilizing brain disorder–associated protein KCTD13
Source: PubMed Central journal article supplement — Proc Natl Acad Sci U S A. 2024 Mar 15;121(12):e2315707121. doi: 10.1073/pnas.2315707121 (PMC10963008; doi:10.1073/pnas.2315707121), 2024-03-15
Supplement: pnas.2315707121.sapp.pdf [file pnas.2315707121.sapp.pdf]

1 **Supporting information for**

2 **KCTD10 regulates brain development by destabilizing**

3 **brain disorder-associated protein KCTD13**

4 Jianbo Cheng<sup>1#</sup>, Zhen Wang<sup>1#</sup>, Manpei Tang<sup>1#</sup>, Wen Zhang<sup>1#</sup>, Guozhong Li<sup>1#</sup>,

5 Senwei Tan<sup>1</sup>, Chenjun Mu<sup>1</sup>, Mengyuan Hu<sup>1</sup>, Dan Zhang<sup>3</sup>, Xiangbin Jia<sup>1</sup>,

6 Yangxuan Wen<sup>1</sup>, Hui Guo<sup>1,2</sup>, Dan Xu<sup>4</sup>, Liang Liu<sup>5</sup>, Jiada Li<sup>1,2</sup>, Kun Xia<sup>1,2</sup>,

7 Faxiang Li<sup>1,2</sup>, Ranhui Duan<sup>1,2</sup>, Zhiheng Xu<sup>3,1\*</sup>, Ling Yuan<sup>1,2\*</sup>

8

9

10 \* Corresponding authors: Ling Yuan, Zhiheng Xu

11 Email: yuanling@sklmg.edu.cn (YL)

12 zhxu@genetics.ac.cn (ZX)

13

14

15 This PDF file includes:

16 Supplemental Methods and Materials

17 Figures S1 to S8

18 Table S1 and S2

19 Video S1 legend

20

21

22

## 23 **Supplemental Methods and Materials**

### 24 **Plasmids**

25 The cDNA encoding Human KCTD10 and KCTD13 that was used as a template for  
26 plasmid construction was a gift from Dr. Jiahuai Han. The KCTD10-encoding gene  
27 was PCR amplified and inserted into the pEGFP-C1 vector between the EcoRI and  
28 BamHI restriction sites or the pCMS-EGFP vector between the EcoRI and XbaII sites.  
29 The pCMS-EGFP-KCTD10 truncation plasmids ( $\Delta$ IDR,  $\Delta$ BTB, and  $\Delta$ PCNA) were  
30 generated by site-directed mutagenesis PCR using KOD-Plus-Neo polymerase  
31 (ToYoBo). In addition, Human *KCTD13* cDNA was PCR amplified and subcloned  
32 into the pmCherry-C1 vector between the EcoRI and BamHI sites and the pcDNA3.1-  
33 HA vector. All constructs were confirmed by DNA sequencing.

### 34 **Cell culture and plasmid transfection**

35 HEK293T and NIH3T3 cells (ATCC) were maintained in DMEM (Gibco)  
36 supplemented with 10% fetal bovine serum (FBS, Gibco) at 37 °C with 5% CO<sub>2</sub>.  
37 NIH3T3 cells were seeded on coverslips in 24-well plates at the desired confluence  
38 and transiently transfected with plasmids using Lipofectamine 2000 (Invitrogen)  
39 according to the manufacturer's instructions. After 20–24 h, the cells were fixed in  
40 4% PFA for 15 min at room temperature, washed with PBS, permeabilized with 0.3%  
41 Triton X-100 in PBS for 15 min, washed with PBS, and blocked for 1 h in blocking  
42 buffer (PBS containing 10% FBS, 5% BSA, 0.01% NaN<sub>3</sub>, and 0.2% Triton X-100) at  
43 room temperature.

### 44 **Western blotting and co-immunoprecipitation**

#### 45 ***Immunoblotting***

46 Isolated mouse cortices or HEK293T cells were lysed in cell lysis buffer (50 mM  
47 Tris-HCl, 150 mM NaCl, 1 mM EDTA, 1% NP40, pH 7.4) containing protease  
48 inhibitors. After sonication, the lysates were centrifuged at 13,000 × g for 10 min at  
49 4°C, and protein concentrations in the collected supernatants were assessed by

50 bicinchoninic acid assay (BCA) using a Spectramax iD3 plate reader. The proteins  
51 were then separated by SDS–polyacrylamide gel electrophoresis, transferred onto  
52 nitrocellulose membranes (Millipore, Bedford, MA, USA) using a Pyxis Gel  
53 Processor, blocked with 5% (*m/v*) skimmed milk for 1 h at room temperature, and  
54 incubated with primary antibodies diluted in PBS containing 5% BSA and 0.1% NaN<sub>3</sub>  
55 at 4°C overnight. The next day, the membranes were washed three times with TBS,  
56 10 min each wash, and then incubated with secondary antibodies at room temperature  
57 for 1 h.

### 58 ***Co-immunoprecipitation***

59 For endogenous co-IP, cerebral cortices freshly dissected from E14.5 mouse embryos  
60 were lysed in cell lysis buffer (50 mM NaCl, 0.5% NP-40, 10 mM HEPES, 0.5 mM  
61 EDTA, 20 mM Tris, pH 7.4) supplemented with Complete Protease Inhibitor Tablets  
62 (Roche Applied Science) and 1 mM PMSF. Cell debris was pelleted at 13,000 rpm for  
63 10 min at 4°C and the cell lysates were subjected to IP using protein A/G beads pre-  
64 incubated with antibodies against KCTD10 (PA553138, Invitrogen) or KCTD13  
65 (HPA043524, Sigma) and rabbit IgG (PM035, MBL) at 4°C for 1.5 h with gentle  
66 rotation. Immunoprecipitates were washed 3-5 times with cell lysis buffer, eluted with  
67 2 × SDS sample buffer, and analyzed by SDS–PAGE as described above.

68 For exogenous co-IP, HEK293T cells were transfected with equal amounts of the  
69 indicated plasmids using VigoFect (Vigorous Biotechnology Beijing Co., Ltd.). After  
70 24 h, the transfected cells were lysed in cell lysis buffer (50 mM NaCl, 0.5% NP-40,  
71 10 mM HEPES, 0.5 mM EDTA, 20 mM Tris, pH 7.4) supplemented with a protein  
72 inhibitor cocktail and incubated on ice for 30 min, with mixing by inversion every 10  
73 min. After centrifugation, the supernatant was incubated with Flag-M2 beads at 4° C  
74 for 4 h with gentle rotation and mixing, or with anti-HA magnetic beads at 4°C  
75 overnight. The subsequent steps were the same as those used for endogenous co-IP.

### 76 **Immunofluorescence Analysis**

77 Embryonic mouse brains were dissected out and immediately fixed in 4% PFA  
78 overnight at 4 ° C. Brain tissues were subsequently transferred to 30% sucrose until  
79 completely dehydrated, embedded in optimum cutting temperature (OCT) compound,  
80 frozen at -80°C for at least 2 h, and cryosectioned into 20 µm slices for  
81 immunostaining. For the majority of immunofluorescence staining, tissue sections  
82 were incubated for 1 h at room temperature in blocking buffer (10% horse serum and  
83 5% BSA in PBS with 0.2% Triton X-100) containing 0.01% NaN<sub>3</sub> and then incubated  
84 with primary antibodies diluted in the same blocking buffer at 4°C overnight. After  
85 washing three times with 0.2% Triton X-100 in PBS, the brain sections were  
86 incubated with the appropriate fluorescent-labeled secondary antibodies diluted in  
87 blocking buffer for 1 h at room temperature, washed three times with 0.2% Triton X-  
88 100 in PBS, and counterstained with DAPI at room temperature for 10 min. Images  
89 were acquired with a confocal laser scanning microscope (Leica SP8 and Zeiss LSM  
90 980).

### 91 **Grip force measurement**

92 The grip force test is utilized to measure the grip force of the forelimbs or all limbs.  
93 Grip force was assessed using a digital grip strength meter (Ugo Basile 47200),  
94 equipped with a fine metal grid fixed on the sensor. During the test, each mouse was  
95 lifted by the tail and encouraged to grip horizontal rigid grids linked to a digital force  
96 gauge. Subsequently, the tail was gently pulled backward horizontally while  
97 maintaining the mouse's body parallel to the grid. The peak tension value recorded on  
98 the digital force gauge represented the maximum grip strength exerted until the mouse  
99 released its grasp. The reported value for each mouse is an average of three test  
100 attempts, with a 5-minute rest period between each test.

### 101 **Footprint analysis**

102 Footprint analysis was conducted to examine the gait patterns of mice using a 70 cm  
103 long and 7 cm wide flat passageway. Red and blue pigments were applied to the  
104 mice's forelimbs and hind limbs, respectively. Following acclimation to the

105 designated pathway, the mice aged P19 or P23 were allowed to walk freely in the  
106 passageway. The step stances, including the stride length of the left hind limb, left  
107 forelimb, right hind limb, and right forelimb, as well as the forelimb stance and hind  
108 limb stance, were measured. Each index required an average of more than 6 steps for  
109 statistical analysis.

#### 110 **Open field test**

111 Wild-type (WT) or *Kctd10* cKO mice aged P20 or P23 were individually placed at the  
112 center of a 72 cm × 72 cm × 40 cm open-field arena. Their movement trajectories  
113 were recorded for 30 minutes using the Smart V3.0 behavioral analysis software. The  
114 total movement distance, resting duration, and rearing duration were then calculated.  
115 Before commencing each subsequent trial, the open-field arena was thoroughly  
116 cleaned with 75% ethanol.

#### 117 **Cylinder test**

118 Wild-type (WT) or *Kctd10* cKO mice at P20 were placed in a transparent plexiglass  
119 cylinder measuring 20 cm in diameter and 40 cm in height, and their movements were  
120 recorded from top to bottom for 15 minutes. After the test, the mice were returned to  
121 their original cage, and the apparatus was cleaned before the next mouse was tested.  
122 Subsequently, the duration and frequency of standing were quantified.

#### 123 ***In utero* electroporation**

124 *In utero* electroporation was conducted as previously reported(1), with minor  
125 modifications. In brief, on E13.5 or E14.5, pregnant ICR mice were deeply  
126 anesthetized with 2,2,2-tribromoethanol (30 mg/kg body weight) in tert-amyl alcohol.  
127 Plasmid DNA (2–3 mg/mL) was mixed with 0.2% Fast Green (2 mg/mL; Sigma) and  
128 was randomly microinjected into one fetal lateral ventricle through a polished glass  
129 micropipette (Drummond). Throughout the procedure, the uterus was kept moist by  
130 applying pre-warmed normal saline dropwise. Five pulses of current (30 mV for 50  
131 ms, 950 ms interval) were delivered across the head of the embryos with a 7-mm  
132 diameter Tweezertrode Electrode (BTX Harvard Apparatus) using an electroporator

133 (ECM-830 BTX, Harvard Apparatus). At the corresponding time, the embryos were  
134 dissected for phenotypic analysis.

### 135 **Neurosphere culture**

136 Neural progenitors were isolated from the cerebral cortex of E14.5 embryos. After  
137 harvesting, the embryos were placed in pre-cooled PBS, and the brains were dissected  
138 and transferred to a 6-cm-diameter dish containing HBSS. Once the meninges and  
139 cerebral nuclei had been peeled off, the cerebral cortex was isolated and fully digested  
140 with moderate papain at 37°C for 30 min (with shaking once every 5–10 min).  
141 Digestion was terminated by adding 1 mL of DMEM containing 10% FBS. After  
142 centrifugation, the resulting cell pellets were washed three times with proliferation  
143 medium (DMEM/F12 supplemented with 2% B27, 20 ng/mL basic fibroblast growth  
144 factor, 200 ng/mL epidermal growth factor, and 1% penicillin–streptomycin). Finally,  
145 the neural progenitors were inoculated in 6-well plates at a density of  $5 \times 10^4$ – $1 \times 10^5$   
146 cells/mL and cultured at 37°C with 5% CO<sub>2</sub>.

### 147 **RNA extraction and real-time PCR**

148 Total RNA was procured using Trizol reagent (Invitrogen). One microgram of total  
149 RNA was utilized for cDNA synthesis with the iScript reverse transcriptase (Vazyme).  
150 Real-time PCR was conducted using the Power SYBR Green PCR Master Kit  
151 (Thermo Scientific) on a CFX96 (Bio-RAD). Expression data were normalized to the  
152 mean of the housekeeping gene *Gapdh*. For *Kctd13*, two pairs of primers spanning  
153 different exons were employed. The primer sequences are as follows:

154 *Kctd13* (exon 4-5): Fw 5'-ACACAACCGCAGTAACAACA,

155 Rv 5'-CGTAGAAAGACCAGCAGCAA;

156 *Kctd13* (exon 5-6): Fw 5'-TTGCTGCTGGTCTTTCTACG,

157 Rv 5'-GCCACGGGAATTCTCATAAAA;

158 *Gapdh*: Fw 5'- ATCCCAGAGCTGAACGGGAAGC,

159 Rv 5'- TTGGGGGTAGGAACACGGAAGG.

### 160 **Bioinformatics**

161 Gene Ontology (GO) analysis was conducted for highly correlated genes  
162 ( $|\text{Spearman's correlation coefficient}| > 0.7$ ) with *KCTD10* or DEPs identified in  
163 quantitative MS utilizing the Database for Annotation, Visualization, and Integrated  
164 Discovery (DAVID) website (<https://david.ncifcrf.gov/>). Significantly enriched GO  
165 terms were filtered by a P value below 0.05.

## 166 **References**

- 167 1. Saito T (2006) In vivo electroporation in the embryonic mouse central nervous system.  
168 *Nat Protoc* 1(3):1552-1558.

169

170

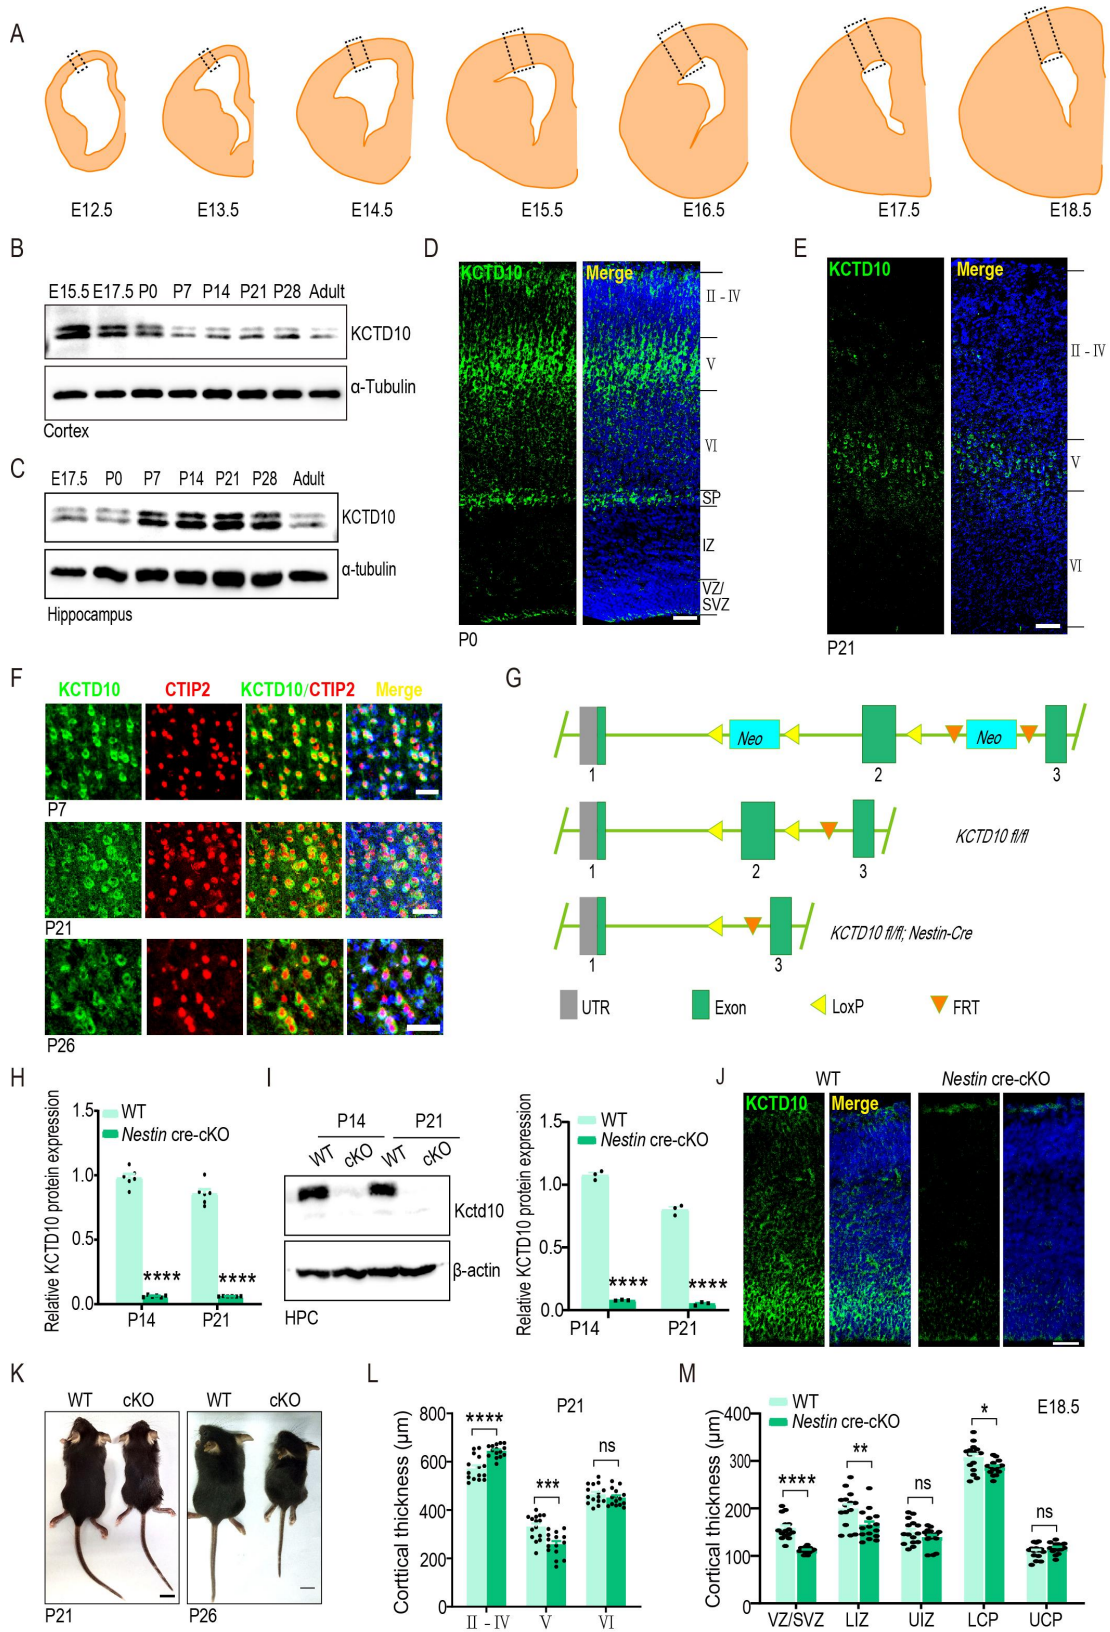



173 **Fig. S1. KCTD10 plays an important role in brain development**, related to Fig. 1.  
 174 (A) E12.5-E18.5 cortices from rostral regions shown in all figures. (B, C) Western blotting analysis of cerebral  
 175 cortex and hippocampus lysates from various developmental stages were analyzed by immunoblotting with  
 176 KCTD10 antibody.  $\alpha$ -tubulin was used as a loading control. (D, E) Representative images of P0 (D) and P21 (E)  
 177 cortices stained for KCTD10 (green) and DAPI (blue). (F) Enlarged images of P7, P21, and P26 cortices stained  
 178 for KCTD10 (green), CTIP2 (red), and DAPI (blue). (G) Gene targeting strategy for *Kctd10* cKO mice. The 2nd  
 179 exon is flanked by two LoxP sequences (yellow triangles). UTR, untranslated region; Neo, selection marker; The  
 180 FLP recombinase recognizes the FRT sites and excises the DNA fragment between them when FRT sites are in the  
 181 same orientation. (H) Quantification of Figure 1F. Relative KCTD10 expression in the cortex of WT and cKO mice  
 182 at P14 and P21. WT and cKO:  $n=6$ . (I) Western blotting results showing loss of KCTD10 in the hippocampus of  
 183 *Nestin*-cKO mice at P14 and P21.  $\beta$ -Actin was used as a loading control. Relative protein expression of KCTD10  
 184 (right panel). WT and cKO:  $n=3$ . ( $n$ , brain numbers). (J) Representative images of WT and *Kctd10* cKO cortices on  
 185 E14.5 stained for KCTD10 (green) and DAPI (blue). (K) Representative images of WT and *Kctd10* cKO mice at  
 186 P21 and P26. (L) Quantification of cortical thickness on P21 in Fig. 3C. WT and cKO:  $n=15/5$ . (M) Quantification  
 187 of cortical thickness on P21 in Fig. 1J. WT and cKO:  $n=15/5$ . All data are mean  $\pm$  SEM (error bars). Student's  $t$ -test.  
 188 \* $P<0.05$ , \*\* $P<0.01$ , \*\*\* $P<0.001$ , \*\*\*\* $P<0.0001$ . Scale bars: 50  $\mu$ m (D, F, J), 100  $\mu$ m (E), and 2 mm (K).  
 189  
 190

## Figure S2

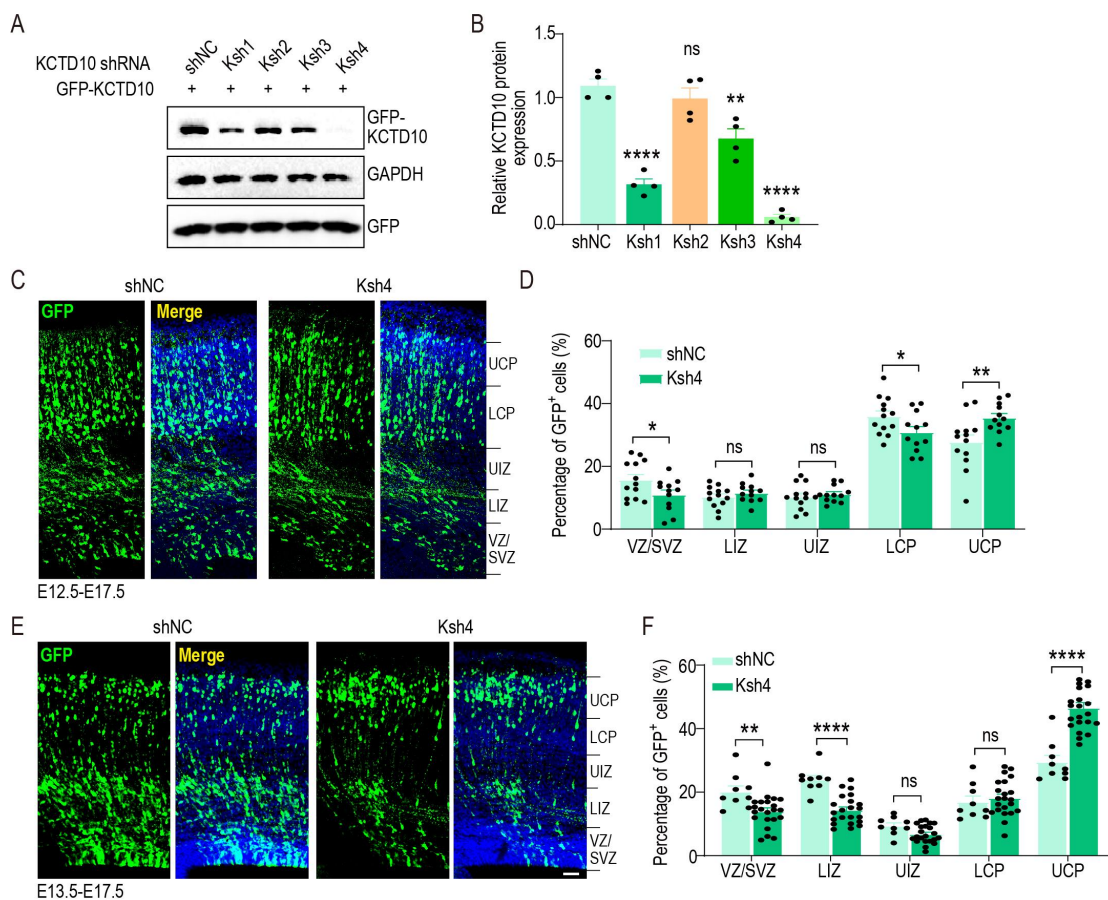

191  
 192 **Fig. S2. KCTD10 knockout affects the cellular distribution in the developing cortex**, related to Fig. 1.  
 193 (A) Knockdown efficiency of shRNAs targeting *Kctd10* confirmed by Western blotting. (B) Quantification of (A).  
 194 Relative KCTD10 expression when GFP- KCTD10 co-transfected with control (shNC) or *Kctd10* shRNA (Ksh1-  
 195 Ksh4) for 48h.  $n=3$  from 3 independent experiments. (C) Representative images of E17.5 cortices electroporated  
 196 on E12.5 with shNC or *Kctd10* shRNA4 (Ksh4). (D) Quantification of the percentage of transfected cells in each  
 197 respective region. shNC:  $n=13/3$ , Ksh4:  $n=12/3$ . (E) Representative images from E17.5 cortices electroporated on  
 198 E13.5 with shNC or *Kctd10* shRNA4 (Ksh4) and stained with GFP antibody, and DAPI (blue). (F) Quantification  
 199 of the percentage of transfected cells in each region. shNC:  $n=9/3$ , Ksh4:  $n=22/6$ . All data are presented mean  $\pm$   
 200 SEM (error bars). Student's  $t$ -test. \*\* $P<0.01$ , \*\*\*\* $P<0.0001$ , ns: no significance. Scale bars: 50  $\mu$ m (C).

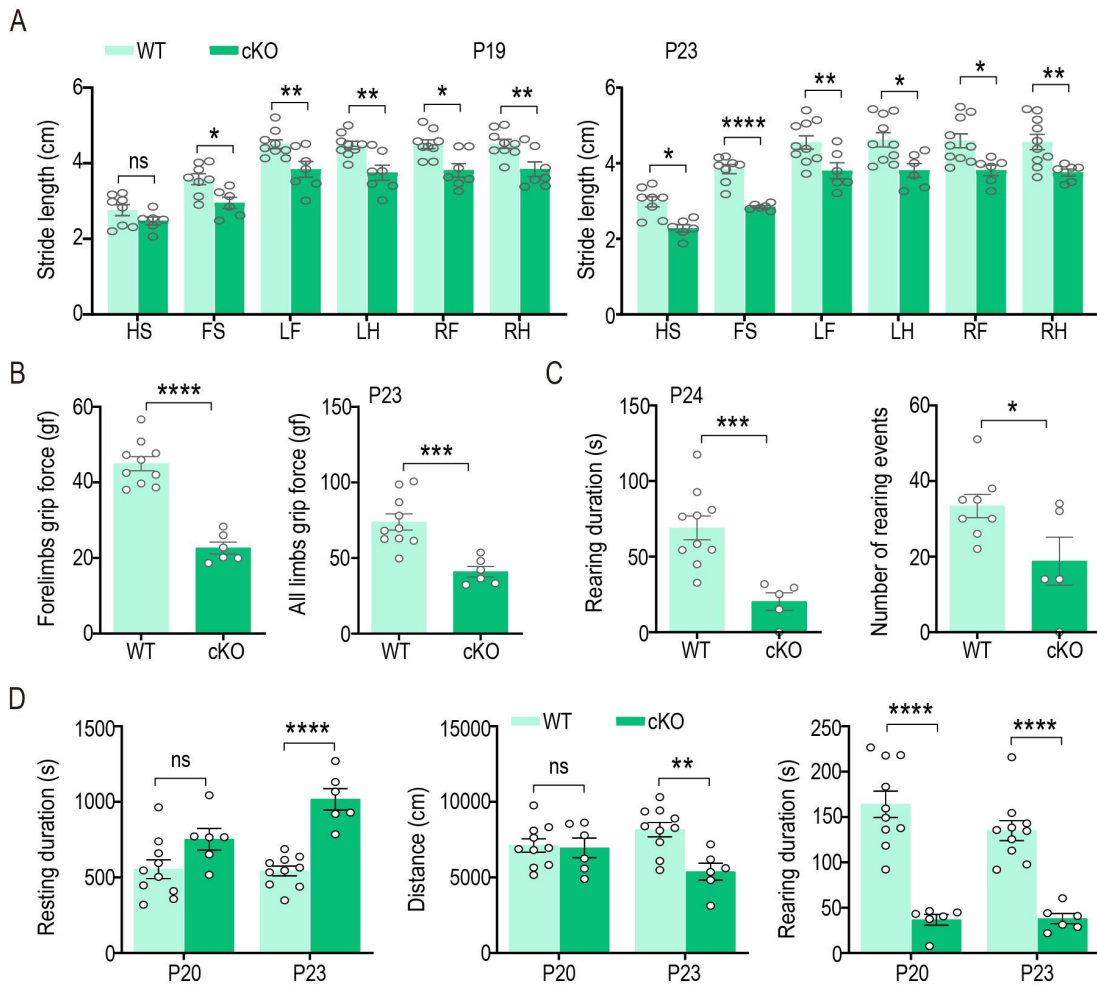

202

203

204 **Fig. S3. *Kctd10* cKO mice exhibit motor deficits**, related to Fig. 1.

205 (A) Abnormal footprints detected in *Kctd10* cKO mice at both P19 and P23. The stride length (cm) and limb  
 206 stance (left, right, hind limb and forelimb) were assessed using footprint tests. HS: Hind limb stance, FS: Forelimb  
 207 stance, LF: Left forelimb, LH: Left hind limb, RF: Right forelimb, RH: Right hind limb. WT:  $n=8$ , cKO:  $n=6$   
 208 ( $n$ =mice numbers). (B) Comparison of grip force (gf: gram force) in the limbs of the WT and *Kctd10* cKO mice at  
 209 P23. WT:  $n=10$ , cKO:  $n=6$ . (C) Comparison of the number and duration of rearing events analyzed in WT and  
 210 *Kctd10* cKO mice during the cylinder experiment. WT:  $n=10$ , cKO:  $n=5$ . (D) Assessment of resting duration,  
 211 rearing duration, and total moving distance during the open field assay. WT:  $n=10$ , cKO:  $n=6$ . All data are  
 212 presented as mean  $\pm$  SEM (error bars). Student's  $t$ -test. \* $P<0.05$ , \*\* $P<0.01$ , \*\*\* $P<0.001$ , \*\*\*\* $P<0.0001$ , ns: no  
 213 significance.

214

215

216

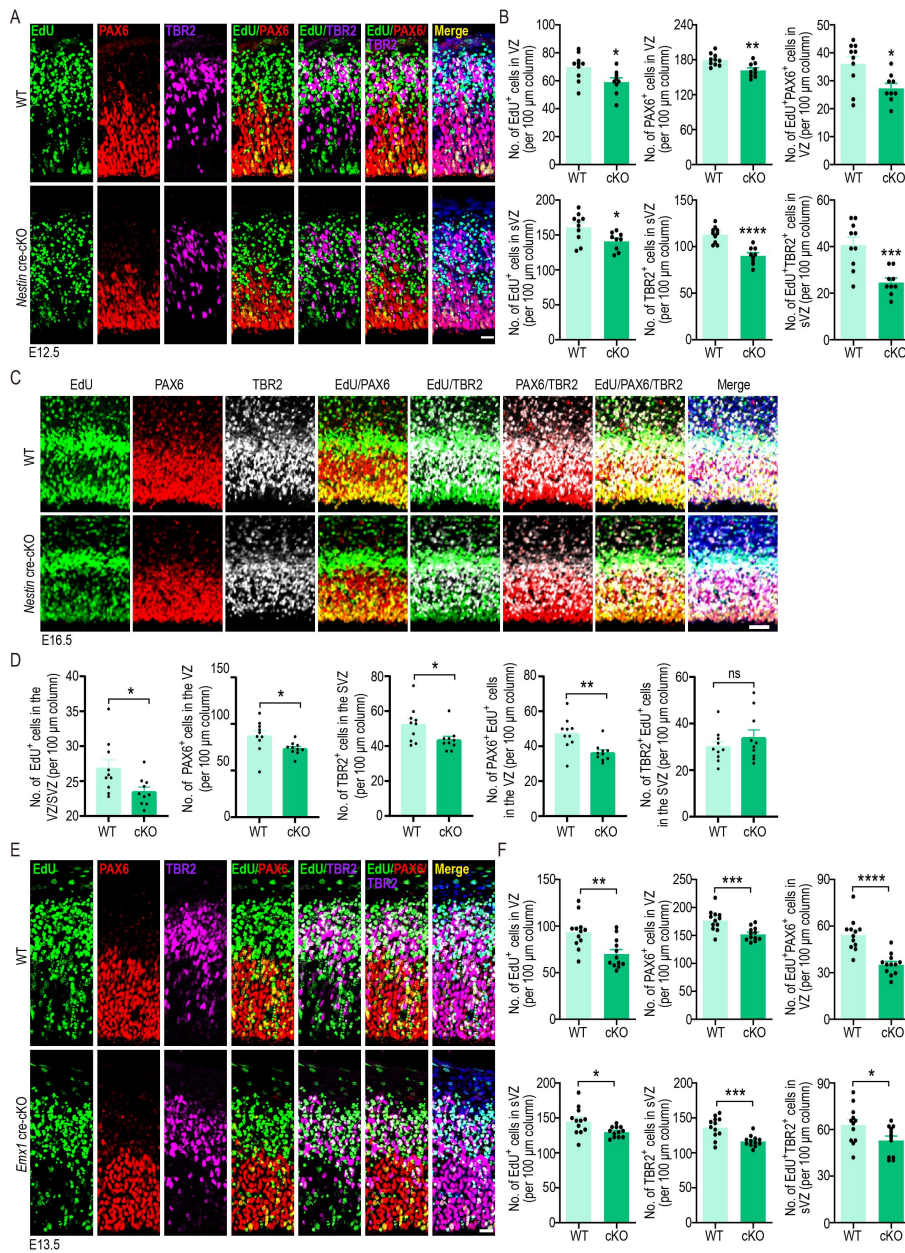

**Fig. S4. *Kctd10* deficiency suppresses the proliferation of NPCs, related to Fig. 2.**

(A) Representative images of E12.5 WT and *Kctd10* Nestin-cre cKO mouse cortices stained for EdU (green), PAX6 (red), TBR2 (magenta) and with DAPI (blue). EdU was administered at E11.5. (B) Quantification of the number of EdU<sup>+</sup> cells and PAX6<sup>+</sup> cells in the VZ, EdU<sup>+</sup> cells and TBR2<sup>+</sup> cells in the SVZ, EdU<sup>+</sup>PAX6<sup>+</sup> in the VZ, and EdU<sup>+</sup>TBR2<sup>+</sup> in the SVZ per 100 μm column in (A). WT: n=10/3, cKO: n=9/3. (C) Representative images of E16.5 WT and *Kctd10* cKO mouse cortices stained for EdU (green), PAX6 (red), TBR2 (gray), and with DAPI (blue). EdU was injected at E15.5. (D) Quantification of the number of EdU<sup>+</sup> cells in the VZ/SVZ, PAX6<sup>+</sup> cells in the VZ, TBR2<sup>+</sup> cells in the SVZ, EdU<sup>+</sup>PAX6<sup>+</sup> in the VZ, and EdU<sup>+</sup>TBR2<sup>+</sup> in the SVZ per 100 μm column in (C). WT, cKO: n=10/3. (E) Representative images of E13.5 WT and *Kctd10* *EMX1* cre cKO mouse cortices stained for EdU (green), PAX6 (red), TBR2 (magenta), and counterstained with DAPI (blue). EdU labeling was performed following injection at E12.5. (F) Quantification of the number of EdU<sup>+</sup>, PAX6<sup>+</sup>, EdU<sup>+</sup>PAX6<sup>+</sup> cells in the VZ, EdU<sup>+</sup>, TBR2<sup>+</sup>, and EdU<sup>+</sup>TBR2<sup>+</sup> cells in the SVZ per 100 μm column in (E). WT, cKO: n=12/4. All data are mean±SEM. Student's *t*-test. \**P*<0.05, \*\**P*<0.01, \*\*\**P*<0.001, \*\*\*\**P*<0.0001. n=slice/brain numbers. Scale bars: 50 μm (C), 20 μm (A, E).

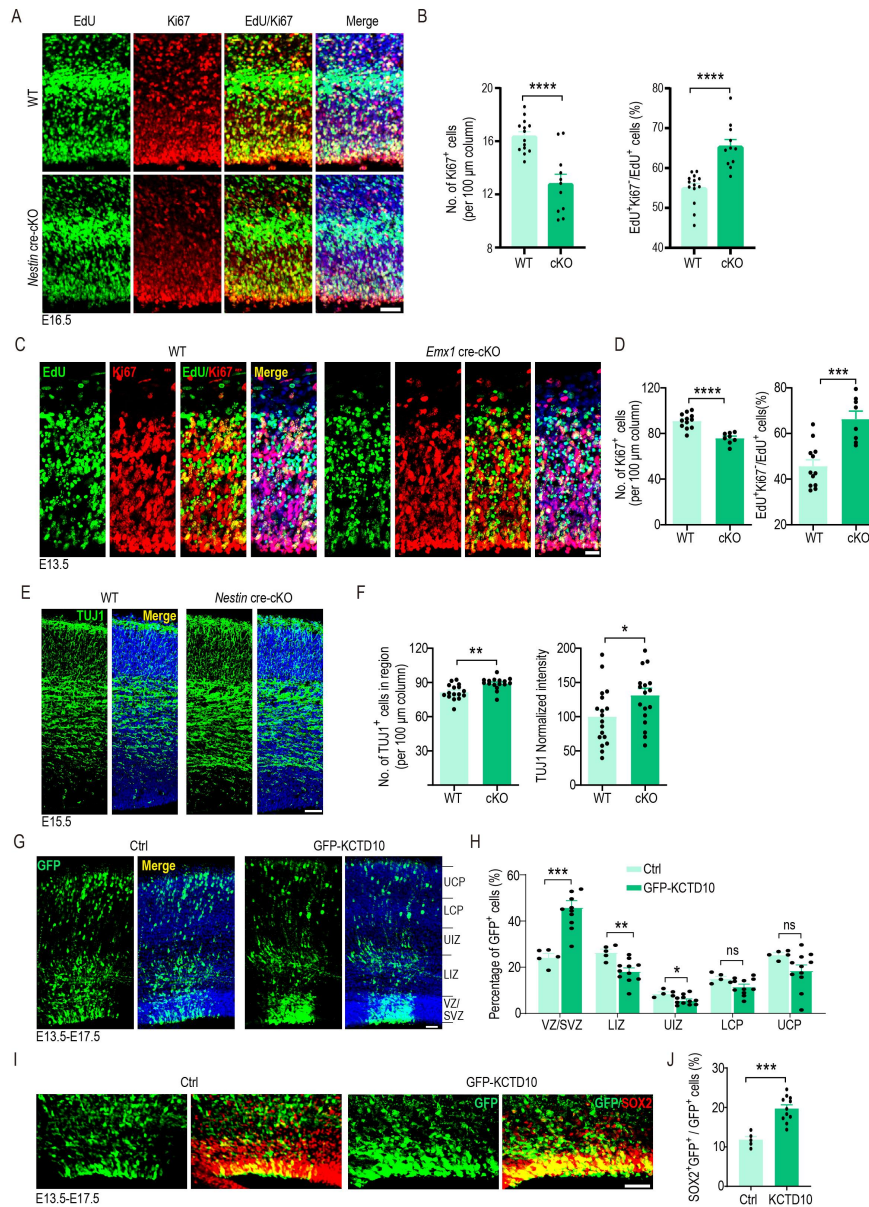

**Fig. S5. *Kctd10* deficiency leads to premature differentiation of NPCs, related to Fig. 2.**

(A) Representative images of E16.5 WT and *Kctd10* cKO cortices stained for EdU (green), Ki67 (red), and with DAPI (blue). (B) Quantification of the number of Ki67<sup>+</sup> cells per 100 μm column and the percentage of Edu<sup>+</sup>Ki67<sup>+</sup>/Edu<sup>+</sup> cells represented exiting the cell cycle. WT, cKO: *n*=10/3. (C) Representative images of E13.5 WT and *Kctd10* *EMX1* cre-cKO cortices stained for EdU (green), Ki67 (red), and with DAPI (blue). (D) Quantification of the number of Ki67<sup>+</sup> cells per 100 μm column and the percentage of Edu<sup>+</sup>Ki67<sup>+</sup>/Edu<sup>+</sup> cells represented exiting the cell cycle. WT: *n*=12/4, cKO: *n*=8/3. (E) Representative images of E15.5 WT and *Kctd10* cKO cortices stained for TUJ1 (green) and with DAPI (blue). (F) Quantification of the number of TUJ1<sup>+</sup> cells per 100 μm column and normalized intensity of TUJ1. WT, cKO: *n*=16/4. (G) Representative images are from E17.5 cortices electroporated on E13.5 with empty vector (Ctrl) or GFP-KCTD10 and stained with GFP antibody and DAPI (blue). (H) Quantification of the percentage of GFP<sup>+</sup> cells in the VZ/SVZ, LIZ, UIZ, LCP and UCP in (G). Ctrl: *n*=5/3, GFP-KCTD10: *n*=11/4. (I) Representative images are from E17.5 cortices electroporated on E13.5 with empty vector (Ctrl) or GFP-KCTD10 and stained with indicated antibodies. (J) Quantification of the percentage of GFP<sup>+</sup>SOX2<sup>+</sup>/GFP<sup>+</sup> cells in the VZ/SVZ. Ctrl: *n*=5/3, GFP-KCTD10: *n*=11/4. *n*=slice/brain numbers. All data are mean±SEM. Student's *t*-test. \**P*<0.05, \*\**P*<0.01, \*\*\**P*<0.001, \*\*\*\**P*<0.0001. *n*=slice/brain numbers. Scale bars: 50 μm (A, E, G, I), 20 μm (C).

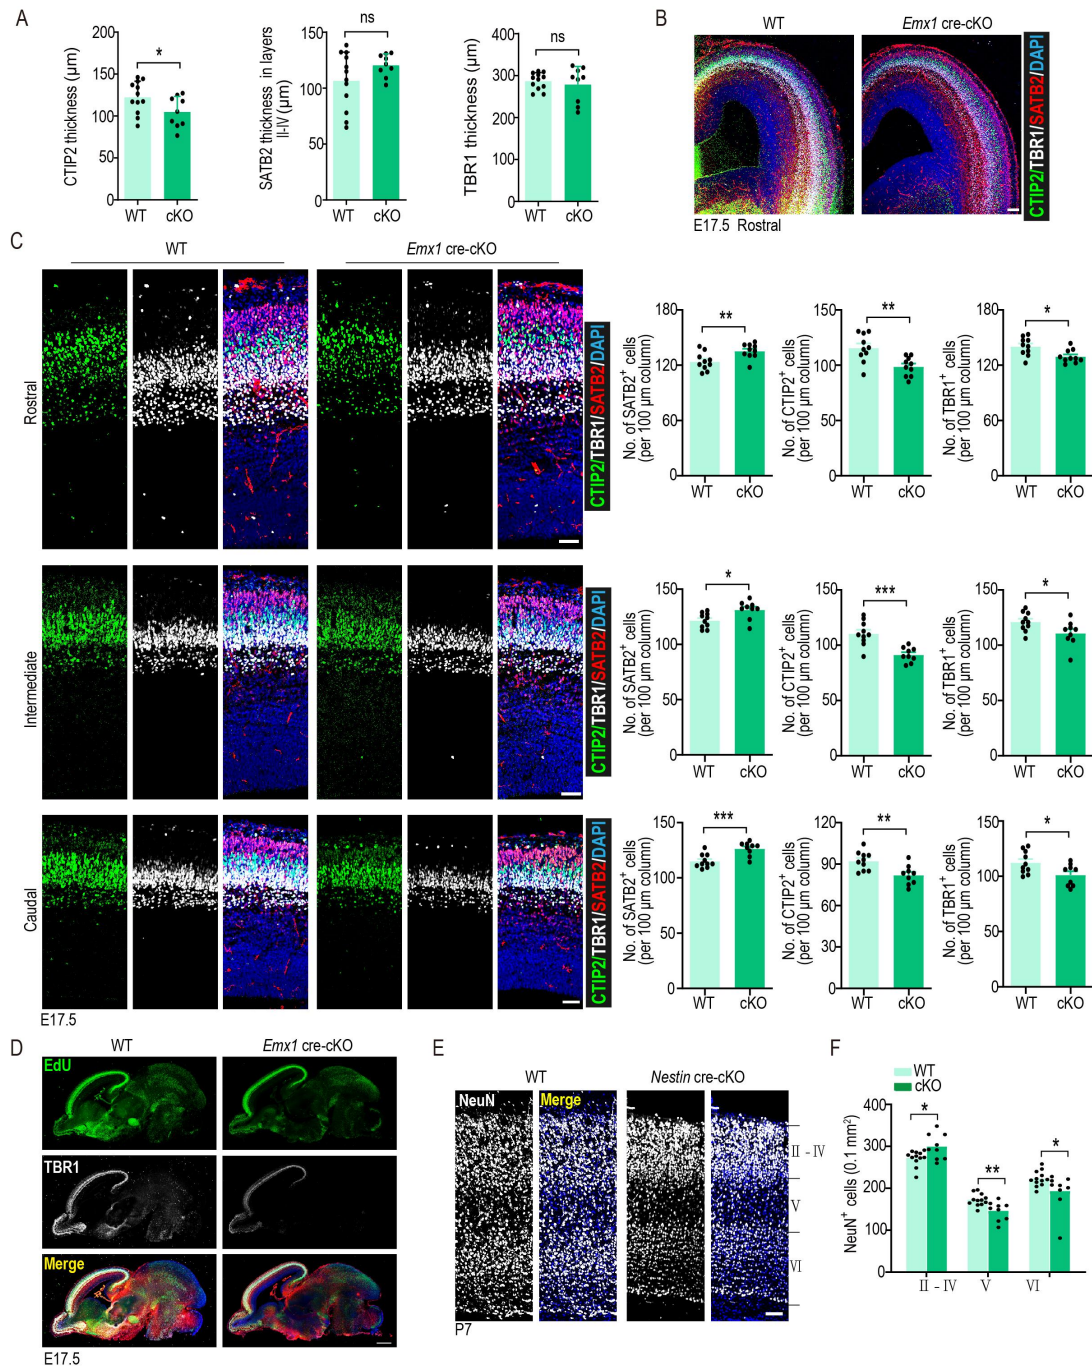

**Fig. S6. KCTD10 knockout affects the production of cortical neurons, related to Fig. 3.**

(A) Quantification of the thickness of SATB2<sup>+</sup>, CTIP2<sup>+</sup> and TBR1<sup>+</sup> neuronal layers in Fig. 3A. CTIP2 (WT:  $n=12/4$ , cKO:  $n=9/3$ ), TBR1 and SATB2 (WT:  $n=12/4$ , cKO:  $n=9/3$ ). (B) E17.5 cortices from rostral regions of WT and cKO embryos shown in (C) were co-stained for CTIP2 (green), TBR1 (gray), SATB2 (red) and DAPI (blue). (C) E17.5 cortices from rostral, intermediate and caudal regions of WT and cKO embryos co-stained for CTIP2 (green), TBR1 (gray), SATB2 (red) and DAPI (blue). WT:  $n=10/3$ , cKO:  $n=10/3$  (rostral), cKO:  $n=9/3$  (intermediate and caudal). (D) Representative sagittal sections of E17.5 WT and cKO brains immuno-stained for CTIP2 (green), TBR1 (gray), SATB2 (red) and DAPI (blue). (E) Representative coronal sections of P7 WT and cKO brains stained for NeuN (gray). (F) Quantification of NeuN<sup>+</sup> cells per 0.1 mm<sup>2</sup> in (E). WT:  $n=12/4$ , cKO:  $n=9/3$ . All data are mean  $\pm$  SEM. Student's *t*-test. \* $P<0.05$ , \*\* $P<0.01$ . ns: no significance.  $n$  = slice/brain numbers. Scale bars: 50  $\mu$ m (C), 100  $\mu$ m (B, E), 500  $\mu$ m (D).

264 **Figure S7**

265

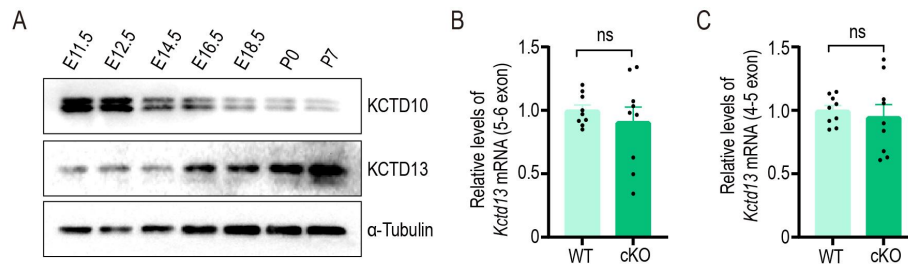

266

267 **Fig. S7. *Kctd10* loss has no effects on *Kctd13* mRNA level, related to Fig. 5.**

268 (A) Western blotting analysis of cerebral cortex lysates from various developmental stages were analyzed by  
 269 immunoblotting with KCTD10 and KCTD13 antibody.  $\alpha$ -tubulin was used as a loading control. (B, C) The mRNA  
 270 levels of *Kctd13* in the cerebral cortex of WT and *Kctd10* cKO mouse at E13.5 were determined by Real-time PCR  
 271 using two different primers spanning exon 5 and 6 or exon 4 and 5.  $\beta$ -Actin was used as an internal control. All data  
 272 are presented as mean  $\pm$  SEM. Student's *t*-test. ns: no significance.

273

274 **Figure S8**

275

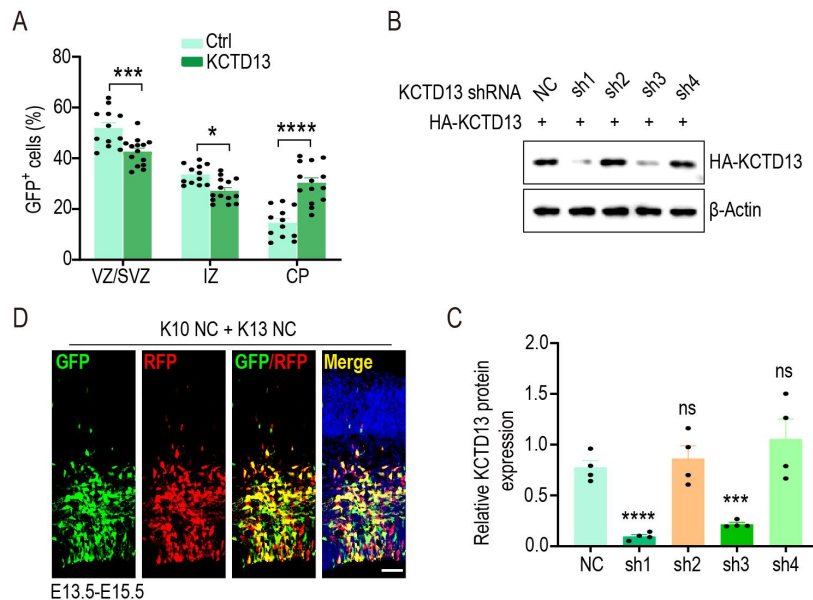

276

277 **Fig. S8. Overexpression of KCTD13 leads to abnormal cell distribution in the developing cortex, related to**  
 278 **Fig. 6.**

279 (A) Quantification of the percentage of GFP<sup>+</sup> cells in the VZ/SVZ, IZ or CP. Ctrl:  $n=12/3$ , HA-KCTD13:  $n=14/4$ .  
 280  $n$ =slice/brain numbers. (B) Knockdown efficiency of *Kctd13* targeting shRNAs confirmed by Western blot analysis.  
 281 (C) Quantification of (B). Relative KCTD13 expression when HA - KCTD10 co-transfected with negative control  
 282 (NC) or *Kctd13* shRNA (sh1-sh4) for 48 hours.  $n=3$  from 3 independent experiments. (D) Representative images  
 283 from E15.5 cortices electroporated on E13.5 with GFP fused K10 NC and RFP fused K13 NC stained with GFP,  
 284 RFP antibody, and DAPI (blue). Almost all transfected cells were both GFP and RFP positive. Scale bar: 50  $\mu$ m.  
 285 All data are presented as mean  $\pm$  SEM. Student's *t*-test. \* $P<0.05$ , \*\*\* $P<0.001$ , \*\*\*\* $P<0.0001$ . ns: no  
 286 significance.

287

**Table S1. Unique proteins pulled down by the KCTD10 antibody**

| Protein name                                                                   | Gene name | Protein score | Sequence coverage (%) | No. specific peptides | No. peptides | No. secondary spectra | Abundance |
|--------------------------------------------------------------------------------|-----------|---------------|-----------------------|-----------------------|--------------|-----------------------|-----------|
| Hsc70-interacting protein                                                      | St13      | 788           | 33                    | 13                    | 13           | 25                    | 2.13E+09  |
| AP-1 complex subunit beta-1                                                    | Ap1b1     | 760           | 20                    | 5                     | 13           | 19                    | 9.61E+06  |
| Epidermal growth factor receptor substrate 15                                  | Eps15     | 424           | 18                    | 11                    | 11           | 12                    | 2.89E+07  |
| Keratin, type II cytoskeletal 6A                                               | Krt6a     | 384           | 12                    | 2                     | 8            | 13                    | 2.55E+07  |
| BTB/POZ domain-containing adapter for CUL3-mediated RhoA degradation protein 3 | Kctd10    | 329           | 20                    | 6                     | 8            | 12                    | 6.69E+07  |
| Keratin, type I cytoskeletal 17                                                | Krt17     | 307           | 18                    | 1                     | 10           | 12                    | 1.81E+08  |
| Centrosomal protein of 112 kDa                                                 | Cep112    | 242           | 11                    | 7                     | 7            | 8                     | 1.28E+07  |
| Fibrinogen beta chain                                                          | Fgb       | 217           | 16                    | 5                     | 5            | 5                     | 2.13E+07  |
| Flavin reductase (NADPH)                                                       | Blvrb     | 212           | 23                    | 3                     | 3            | 4                     | 5.47E+06  |
| DNA damage-binding protein 1                                                   | Ddb1      | 184           | 5                     | 4                     | 4            | 4                     | 7.11E+06  |
| 14-3-3 protein beta/alpha                                                      | Ywhab     | 169           | 23                    | 1                     | 6            | 6                     | 2.66E+06  |
| Keratin, type I cytoskeletal 19                                                | Krt19     | 163           | 9                     | 1                     | 5            | 5                     | 3.88E+06  |
| BTB/POZ domain-containing adapter for CUL3-mediated RhoA degradation protein 1 | Kctd13    | 162           | 20                    | 3                     | 5            | 5                     | 9.08E+06  |
| Sodium/potassium-transporting ATPase subunit alpha-1                           | Atp1a1    | 149           | 6                     | 2                     | 4            | 4                     | 1.09E+07  |
| Histone H2A type 3                                                             | H2aw      | 144           | 35                    | 2                     | 4            | 5                     | 5.84E+08  |
| Rabphilin-3A                                                                   | Rph3a     | 135           | 15                    | 5                     | 5            | 5                     | 1.21E+07  |
| ELAV-like protein 2                                                            | Elavl2    | 132           | 13                    | 1                     | 5            | 5                     | 2.74E+06  |
| BTB/POZ domain-containing protein 9                                            | Btbd9     | 125           | 8                     | 3                     | 3            | 3                     | 2.55E+06  |
| Keratin, type II cuticular Hb4                                                 | Krt84     | 123           | 5                     | 1                     | 4            | 5                     | 1.97E+06  |
| Exopolyphosphatase PRUNE1                                                      | Prune1    | 119           | 11                    | 3                     | 3            | 3                     | 4.78E+06  |
| DnaJ homolog subfamily B member 1                                              | Dnajb1    | 116           | 13                    | 4                     | 4            | 4                     | 8.96E+06  |
| Traf2 and NCK-interacting protein kinase                                       | Tnik      | 112           | 3                     | 1                     | 5            | 5                     | 2.83E+06  |
| 5'-3' exoribonuclease 2                                                        | Xrn2      | 108           | 3                     | 2                     | 2            | 2                     | 5.39E+05  |

|                                                             |         |     |    |   |   |   |          |
|-------------------------------------------------------------|---------|-----|----|---|---|---|----------|
| Pre-mRNA-processing factor 6                                | Prpf6   | 106 | 4  | 3 | 3 | 3 | 5.70E+06 |
| DAZ-associated protein 1                                    | Dazap1  | 100 | 8  | 2 | 2 | 2 | 5.08E+06 |
| Tenascin-R                                                  | Tnr     | 100 | 2  | 2 | 2 | 2 | 1.93E+06 |
| Protein TSSC4                                               | Tssc4   | 99  | 8  | 2 | 2 | 2 | 4.56E+06 |
| ATP-dependent RNA helicase DHX30                            | Dhx30   | 97  | 3  | 3 | 3 | 3 | 3.15E+06 |
| Coiled-coil domain-containing protein 177                   | Ccdc177 | 94  | 3  | 2 | 2 | 2 | 3.82E+06 |
| Serine/threonine-protein phosphatase 6 regulatory subunit 2 | Ppp6r2  | 90  | 6  | 4 | 4 | 4 | 6.08E+06 |
| Elongation factor 1-delta                                   | Eef1d   | 89  | 9  | 2 | 2 | 2 | 6.32E+06 |
| Kinesin-1 heavy chain                                       | Kif5b   | 88  | 3  | 2 | 2 | 2 | 3.77E+06 |
| Fibrinogen alpha chain                                      | Fga     | 84  | 3  | 3 | 3 | 3 | 9.86E+06 |
| Fibrinogen gamma chain                                      | Fgg     | 82  | 12 | 4 | 4 | 4 | 1.17E+07 |
| Eukaryotic initiation factor 4A-II                          | Eif4a2  | 81  | 10 | 1 | 3 | 3 | 2.50E+06 |
| Ferritin light chain 2                                      | Ftl2    | 79  | 9  | 1 | 1 | 1 | 1.70E+06 |
| Ig kappa chain V-V region T1                                | Ig      | 76  | 18 | 2 | 2 | 2 | 1.98E+07 |
| Methionine aminopeptidase 2                                 | Metap2  | 74  | 9  | 3 | 3 | 3 | 3.92E+06 |
| AP-1 complex subunit mu-1                                   | Ap1m1   | 74  | 9  | 3 | 3 | 3 | 4.96E+06 |
| Dynamamin-1-like protein                                    | Dnm1l   | 74  | 6  | 4 | 4 | 4 | 6.01E+06 |
| RNA 3'-terminal phosphate cyclase                           | RtcA    | 74  | 4  | 1 | 1 | 1 | 1.01E+06 |
| CLIP-associating protein 2                                  | Clasp2  | 71  | 3  | 2 | 4 | 4 | 3.11E+06 |
| Ig heavy chain V region VH558 A1/A4                         | Gm5629  | 70  | 13 | 1 | 1 | 1 | 2.82E+06 |
| Alpha-1,3/1,6-mannosyltransferase ALG2                      | Alg2    | 70  | 3  | 1 | 1 | 1 | 2.39E+06 |
| 26S proteasome regulatory subunit 7                         | Psmc2   | 65  | 3  | 1 | 1 | 1 | 8.17E+05 |
| Apoptosis regulator BAX                                     | Bax     | 63  | 7  | 1 | 1 | 1 | 1.17E+06 |
| CD2 antigen cytoplasmic tail-binding protein 2              | Cd2bp2  | 62  | 7  | 2 | 2 | 2 | 5.59E+06 |
| Formin-like protein 3                                       | Fmnl3   | 58  | 3  | 2 | 2 | 2 | 3.54E+06 |
| ATP-binding cassette sub-family E member 1                  | Abce1   | 57  | 3  | 1 | 1 | 1 | 2.94E+05 |
| Apoptosis inhibitor 5                                       | Api5    | 56  | 4  | 1 | 1 | 1 | 1.36E+06 |
| Centrosomal protein of 170 kDa                              | Cep170  | 56  | 1  | 1 | 1 | 1 | 1.28E+06 |
| ATP-dependent RNA helicase DDX19A                           | Ddx19a  | 56  | 6  | 2 | 2 | 2 | 5.61E+05 |



|                                                                                    |         |    |    |   |   |   |          |
|------------------------------------------------------------------------------------|---------|----|----|---|---|---|----------|
| Lysine--tRNA ligase                                                                | Kars1   | 55 | 5  | 2 | 2 | 2 | 3.32E+06 |
| U1 small nuclear ribonucleoprotein C                                               | Snrpc   | 54 | 8  | 1 | 1 | 2 | 1.74E+06 |
| Histone H3.3                                                                       | H3-3a   | 53 | 12 | 2 | 2 | 2 | 1.17E+08 |
| 40S ribosomal protein S15                                                          | Rps15   | 52 | 7  | 1 | 1 | 1 | 1.97E+06 |
| RuvB-like 1                                                                        | Ruvbl1  | 50 | 4  | 1 | 1 | 1 | 5.45E+05 |
| Beta-adducin                                                                       | Add2    | 50 | 2  | 1 | 1 | 1 | 1.14E+06 |
| 26S proteasome non-ATPase regulatory subunit 11                                    | Psm11   | 46 | 3  | 1 | 1 | 1 | 1.10E+06 |
| Glutathione peroxidase 1                                                           | Gpx1    | 46 | 7  | 1 | 1 | 1 | 2.76E+06 |
| Serine/threonine-protein phosphatase 4 regulatory subunit 3B                       | Ppp4r3b | 44 | 3  | 2 | 2 | 2 | 1.89E+06 |
| Zinc finger CCH domain-containing protein 15                                       | Zc3h15  | 43 | 3  | 1 | 1 | 1 | 1.50E+06 |
| Phosphoribosyl pyrophosphate synthase-associated protein 2                         | Prpsap2 | 43 | 4  | 1 | 1 | 1 | 2.52E+05 |
| Integrator complex subunit 3                                                       | Ints3   | 41 | 2  | 1 | 1 | 1 | 7.12E+05 |
| ATP-dependent RNA helicase DHX29                                                   | Dhx29   | 40 | 1  | 1 | 1 | 1 | 3.56E+05 |
| Eukaryotic translation initiation factor 1A, X-chromosomal                         | Eif1ax  | 40 | 5  | 1 | 1 | 1 | 8.21E+05 |
| Non-histone chromosomal protein HMG-14                                             | Hmgn1   | 39 | 9  | 1 | 1 | 1 | 4.91E+05 |
| GTP-binding nuclear protein Ran                                                    | Ran     | 39 | 6  | 1 | 1 | 1 | 1.88E+06 |
| 26S proteasome non-ATPase regulatory subunit 12                                    | Psm12   | 39 | 3  | 1 | 1 | 1 | 1.40E+06 |
| Transcription elongation regulator 1                                               | Tcerg1  | 39 | 1  | 1 | 1 | 1 | 3.52E+06 |
| Serine/threonine-protein phosphatase 4 regulatory subunit 2                        | Ppp4r2  | 37 | 4  | 1 | 1 | 1 | 1.63E+06 |
| Serine/threonine-protein phosphatase 6 regulatory ankyrin repeat subunit A         | Ankrd28 | 37 | 1  | 1 | 1 | 1 | 1.88E+06 |
| Unconventional myosin-Ib                                                           | Myo1b   | 37 | 2  | 2 | 2 | 2 | 1.96E+06 |
| DnaJ homolog subfamily C member 2                                                  | Dnajc2  | 37 | 2  | 1 | 1 | 1 | 7.09E+05 |
| Serine/threonine-protein kinase BRSK1                                              | Brsk1   | 36 | 2  | 1 | 1 | 1 | 1.22E+06 |
| High affinity cAMP-specific and IBMX-insensitive 3',5'-cyclic phosphodiesterase 8B | Pde8b   | 35 | 1  | 1 | 1 | 1 | 2.98E+07 |

|                                                                      |           |    |    |   |   |   |          |
|----------------------------------------------------------------------|-----------|----|----|---|---|---|----------|
| Very-long-chain (3R)-3-hydroxyacyl-CoA dehydratase 3                 | Hacd3     | 34 | 3  | 1 | 1 | 1 | 7.82E+05 |
| B-cell receptor-associated protein 31                                | Bcap31    | 34 | 3  | 1 | 1 | 1 | 1.66E+06 |
| Tropomyosin alpha-3 chain                                            | Tpm3      | 33 | 5  | 1 | 1 | 1 | 2.08E+06 |
| Glycerophosphocholine phosphodiesterase GPCPD1                       | Gpcpd1    | 33 | 1  | 1 | 1 | 1 | 6.93E+05 |
| General transcription factor IIF subunit 1                           | Gtf2f1    | 33 | 2  | 1 | 1 | 1 | 3.31E+05 |
| Protein PAT1 homolog 1                                               | Pat11     | 33 | 2  | 1 | 1 | 1 | 7.98E+05 |
| Ig heavy chain V region 3                                            | Ighv1-61  | 33 | 21 | 1 | 1 | 1 | 1.73E+06 |
| Ran-specific GTPase-activating protein                               | Ranbp1    | 32 | 3  | 1 | 1 | 1 | 1.88E+06 |
| Transferrin receptor protein 1                                       | Tfrc      | 32 | 1  | 1 | 1 | 1 | 8.62E+05 |
| Proteasomal ubiquitin receptor ADRM1                                 | Adrm1     | 32 | 4  | 1 | 1 | 1 | 1.31E+06 |
| Mitogen-activated protein kinase 9                                   | Mapk9     | 31 | 3  | 1 | 1 | 1 | 3.16E+05 |
| Mitotic checkpoint protein BUB3                                      | Bub3      | 31 | 3  | 1 | 1 | 1 | 8.47E+05 |
| 60S ribosomal protein L36                                            | Rpl36     | 30 | 10 | 1 | 1 | 1 | 4.37E+06 |
| WD40 repeat-containing protein SMU1                                  | Smu1      | 30 | 2  | 1 | 1 | 1 | 1.77E+06 |
| Protein SHQ1 homolog                                                 | Shq1      | 30 | 1  | 1 | 1 | 1 | 7.31E+06 |
| Sister chromatid cohesion protein PDS5 homolog B                     | Pds5b     | 29 | 0  | 1 | 1 | 1 | 1.42E+06 |
| NADH dehydrogenase [ubiquinone] iron-sulfur protein 8, mitochondrial | Ndufs8    | 29 | 5  | 1 | 1 | 1 | 1.45E+06 |
| Protein SOGA3                                                        | Soga3     | 29 | 1  | 1 | 1 | 1 | 6.35E+06 |
| Ig heavy chain V region 108A                                         | Igh-VJ558 | 29 | 13 | 1 | 1 | 1 | 2.67E+06 |
| WW domain-binding protein 11                                         | Wbp11     | 28 | 1  | 1 | 1 | 1 | 1.64E+06 |
| Lysine-specific demethylase 2A                                       | Kdm2a     | 28 | 1  | 1 | 1 | 1 | 3.39E+06 |
| Cytoplasmic FMR1-interacting protein 1                               | Cyfi1     | 28 | 1  | 1 | 1 | 1 | 4.86E+05 |
| Mitogen-activated protein kinase 7                                   | Mapk7     | 28 | 1  | 1 | 1 | 1 | 3.35E+06 |
| Microtubule-associated protein 4                                     | Map4      | 28 | 1  | 1 | 1 | 1 | 7.69E+05 |
| AP-3 complex subunit beta-2                                          | Ap3b2     | 27 | 1  | 1 | 1 | 1 | 8.47E+05 |
| Polymerase delta-interacting protein 3                               | Poldip3   | 27 | 3  | 1 | 1 | 1 | 9.75E+05 |
| Immunoglobulin-like domain-containing receptor 1                     | Ildr1     | 27 | 1  | 1 | 1 | 1 | 1.37E+07 |
| Delta(14)-sterol reductase LBR                                       | Lbr       | 27 | 1  | 1 | 1 | 1 | 1.12E+06 |

|                                                                        |          |    |    |   |   |   |          |
|------------------------------------------------------------------------|----------|----|----|---|---|---|----------|
| Vacuolar protein sorting-associated protein 51 homolog                 | Vps51    | 26 | 2  | 1 | 1 | 1 | 3.31E+05 |
| Delta-1-pyrroline-5-carboxylate synthase                               | Aldh18a1 | 26 | 1  | 1 | 1 | 1 | 2.82E+06 |
| PCI domain-containing protein 2                                        | Pcid2    | 26 | 3  | 1 | 1 | 1 | 4.49E+05 |
| Probable ATP-dependent RNA helicase DDX46                              | Ddx46    | 26 | 1  | 1 | 1 | 1 | 3.50E+05 |
| Dynein light chain 2, cytoplasmic                                      | Dynll2   | 26 | 12 | 1 | 1 | 1 | 1.68E+06 |
| Putative acidic leucine-rich nuclear phosphoprotein 32 family member C | Anp32c   | 26 | 7  | 1 | 1 | 1 | 2.05E+06 |
| Calcium/calmodulin-dependent protein kinase type II subunit alpha      | Camk2a   | 26 | 1  | 1 | 1 | 1 | 2.10E+06 |
| RAD52 motif-containing protein 1                                       | Rdm1     | 25 | 2  | 1 | 1 | 1 | 1.69E+06 |
| Cell division cycle and apoptosis regulator protein 1                  | Ccar1    | 25 | 1  | 1 | 1 | 1 | 2.38E+06 |
| Lys-63-specific deubiquitinase BRCC36                                  | Brcc3    | 25 | 3  | 1 | 1 | 1 | 6.42E+06 |
| MAP/microtubule affinity-regulating kinase 3                           | Mark3    | 25 | 2  | 1 | 1 | 1 | 1.87E+05 |
| ELKS/Rab6-interacting/CAST family member 1                             | Erc1     | 24 | 1  | 1 | 1 | 1 | 1.21E+06 |
| Coatamer subunit beta'                                                 | Copb2    | 24 | 1  | 1 | 1 | 1 | 1.07E+06 |
| RNA-binding protein 42                                                 | Rbm42    | 23 | 2  | 1 | 1 | 1 | 1.19E+06 |
| Neurocan core protein                                                  | Ncan     | 23 | 1  | 1 | 1 | 1 | 1.49E+06 |
| Zinc finger CCCH domain-containing protein 14                          | Zc3h14   | 23 | 1  | 1 | 1 | 1 | 2.42E+05 |
| Putative sodium-coupled neutral amino acid transporter 11              | Slc38a11 | 22 | 1  | 1 | 1 | 1 | 1.27E+06 |
| Serine/arginine repetitive matrix protein 2                            | Srrm2    | 22 | 0  | 1 | 1 | 1 | 3.38E+05 |
| Ras-related protein Ral-A                                              | Rala     | 22 | 3  | 1 | 1 | 1 | 1.19E+06 |
| Zinc finger C2HC domain-containing protein 1A                          | Zc2hc1a  | 22 | 6  | 1 | 1 | 1 | 1.12E+06 |
| Eukaryotic translation initiation factor 5                             | Eif5     | 22 | 2  | 1 | 1 | 1 | 3.19E+05 |
| Splicing factor 3B subunit 5                                           | Sf3b5    | 21 | 17 | 1 | 1 | 1 | 8.07E+05 |
| Protein enabled homolog                                                | Enah     | 21 | 1  | 1 | 1 | 1 | 1.30E+06 |
| mRNA cap guanine-N7 methyltransferase                                  | Rnmt     | 21 | 3  | 1 | 1 | 1 | 1.21E+06 |

|                                                  |         |     |   |   |   |   |          |
|--------------------------------------------------|---------|-----|---|---|---|---|----------|
| Target of EGR1 protein 1                         | Toe1    | 21  | 2 | 1 | 1 | 1 | 4.29E+05 |
| Structural maintenance of chromosomes protein 1A | Smc1a   | 21  | 1 | 1 | 1 | 1 | 8.05E+05 |
| Histone-lysine N-methyltransferase PRDM16        | Prdm16  | 21  | 1 | 1 | 1 | 1 | 3.08E+06 |
| Galectin-1                                       | Lgals1  | 21  | 6 | 1 | 1 | 1 | 1.29E+06 |
| Structural maintenance of chromosomes protein 3  | Smc3    | 20  | 1 | 1 | 1 | 1 | 6.99E+05 |
| Emerin                                           | Emd     | 20  | 4 | 1 | 1 | 1 | 7.18E+05 |
| AP-5 complex subunit zeta-1                      | Ap5z1   | 20  | 2 | 1 | 1 | 1 | 1.05E+07 |
| YTH domain-containing family protein 3           | Ythdf3  | 163 | 8 | 2 | 4 | 5 | 3.88E+06 |
| Rho guanine nucleotide exchange factor 2         | Arhgef2 | 80  | 2 | 1 | 1 | 1 | 1.74E+06 |
| Exocyst complex component 4                      | Exoc4   | 76  | 3 | 2 | 2 | 2 | 1.80E+06 |
| Nck-associated protein 1                         | Nckap1  | 49  | 2 | 2 | 2 | 2 | 2.73E+05 |
| Regulatory-associated protein of mTOR            | Rptor   | 38  | 1 | 1 | 1 | 1 | 4.83E+05 |
| LanC-like protein 2                              | Lancl2  | 36  | 2 | 1 | 1 | 1 | 8.00E+05 |
| Exosome complex component RRP45                  | Exosc9  | 29  | 2 | 1 | 1 | 1 | 1.72E+06 |
| ATPase family AAA domain-containing protein 3    | Atad3   | 27  | 2 | 1 | 1 | 1 | 1.94E+05 |

289

290

291

292

293

294

295

296

297

**Table S2. Overlapping proteins obtained by quantitative MS and co-IP MS**

| Protein name                                                                       | Gene name | Abundance (co-IP MS) | CKO/WT.Ratio | P.value (CKO/WT) |
|------------------------------------------------------------------------------------|-----------|----------------------|--------------|------------------|
| Fibrinogen alpha chain                                                             | Fga       | 9.86E+06             | 1.74996413   | 5.50E-05         |
| Glutathione peroxidase 1                                                           | Gpx1      | 2.76E+06             | 1.227861483  | 4.86E-05         |
| Galectin-1                                                                         | Lgals1    | 1.29E+06             | 2.755501435  | 4.15E-07         |
| Tropomyosin alpha-3 chain                                                          | Tpm3      | 2.08E+06             | 1.160962396  | 0.046823934      |
| Transferrin receptor protein 1                                                     | Tfrc      | 8.62E+05             | 1.171176406  | 0.003990323      |
| BTB/POZ domain-containing adapter for CUL3-mediated RhoA degradation protein 1     | Kctd13    | 9.08E+06             | 1.186458881  | 0.005633296      |
| Fibrinogen beta chain                                                              | Fgb       | 2.13E+07             | 1.545801945  | 4.08E-06         |
| Fibrinogen gamma chain                                                             | Fgg       | 1.17E+07             | 1.513219403  | 9.69E-05         |
| Structural maintenance of chromosomes protein 3                                    | Smc3      | 6.99E+05             | 1.192566926  | 0.000203533      |
| Apoptosis inhibitor 5                                                              | Api5      | 1.36E+06             | 1.179586773  | 8.15E-05         |
| ATP-dependent RNA helicase DHX29                                                   | Dhx29     | 3.56E+05             | 1.284942405  | 0.000175989      |
| Flavin reductase (NADPH)                                                           | BlvrB     | 5.47E+06             | 1.835790217  | 2.64E-05         |
| Putative sodium-coupled neutral amino acid transporter 11                          | Slc38a11  | 1.27E+06             | 2.281971619  | 0.001833549      |
| Protein SHQ1 homolog                                                               | Shq1      | 7.31E+06             | 2.709705777  | 0.02813395       |
| High affinity cAMP-specific and IBMX-insensitive 3',5'-cyclic phosphodiesterase 8B | Pde8b     | 2.98E+07             | 0.798299227  | 0.00218633       |
| Lysine-specific demethylase 2A                                                     | Kdm2a     | 3.39E+06             | 0.806639593  | 0.00313562       |
| Traf2 and NCK-interacting protein kinase                                           | Tnik      | 2.83E+06             | 0.832220956  | 0.001302252      |
| Apoptosis regulator BAX                                                            | Bax       | 1.17E+06             | 0.760634071  | 0.045913535      |
| Very-long-chain (3R)-3-hydroxyacyl-CoA dehydratase 3                               | Hacd3     | 7.82E+05             | 0.838229928  | 0.001794855      |
| BTB/POZ domain-containing adapter for CUL3-mediated RhoA degradation protein 3     | Kctd10    | 6.69E+07             | 0.821195785  | 0.027640455      |
| AP-3 complex subunit beta-2                                                        | Ap3b2     | 8.47E+05             | 0.709429198  | 0.000116985      |
| Beta-adducin                                                                       | Add2      | 1.14E+06             | 0.84916056   | 0.00019716       |
| Exopolyphosphatase PRUNE1                                                          | Prune1    | 4.78E+06             | 0.807888599  | 1.41E-05         |
| Alpha-1,3/1,6-mannosyltransferase ALG2                                             | Alg2      | 2.39E+06             | 0.630908318  | 0.000122994      |
| AP-5 complex subunit zeta-1                                                        | Ap5z1     | 1.05E+07             | 0.815538645  | 0.004312429      |
| Serine/threonine-protein phosphatase 6 regulatory subunit 2                        | Ppp6r2    | 6.08E+06             | 0.7760701    | 0.000151852      |
| Coiled-coil domain-containing protein 177                                          | Ccdc177   | 3.82E+06             | 0.803092387  | 0.001324082      |

299

300

**Video S1.**

301

*Kctd10*-cKO mice exhibited motor deficits.

302

303
